# Supplementary material for: Fly Ash from Lignite Combustion as a Filler for Rubber Mixes—Part II: Chemical Valorisation of Fly Ash
Source: MDPI journal article supplement (doi:10.3390/ma15175979), 2022-08-29
Supplement: s1 [file s1]

**Table S1.** Structural formulas of the silanes used for the modification of FA.

| Silane                                                         | Structural formula                                                                 |
|----------------------------------------------------------------|------------------------------------------------------------------------------------|
| Vinyltrimethoxysilane<br>- U-611                               | 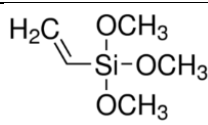 |
| 3-(glycidoxypentyl)trimethoxysilane<br>- U-50                  |  |
| Vinyl-tris(2-methoxy-ethoxy)silane<br>- LUVOMAXX VTMOEO DL50 C |  |
| Mercaptopropyltrimethoxysilane<br>- Dynaslan MTMO              |  |
| Bis(triethoxysilylpropyl)polysulfide<br>- Si-266               |  |

**Table S2.** Influence of thermal aging on hardness (H) of the rubber vulcanizates.

| Sample           | Parameter | H [°ShA] | H after ageing [°ShA] | ΔH [%] |
|------------------|-----------|----------|-----------------------|--------|
|                  |           |          |                       |        |
| CB+FA            |           | 71       | 72                    | +1.4   |
| CB+FA-63         |           | 68       | 68                    | 0.0    |
| CB+FA-125        |           | 66       | 66                    | 0.0    |
| CB+FA-250        |           | 66       | 66                    | 0.0    |
| CB+FA-63-U-50    |           | 76       | 76                    | 0.0    |
| CB+FA-125-U-50   |           | 76       | 74                    | -2.7   |
| CB+FA-250-U-50   |           | 75       | 74                    | -1.4   |
| CB+FA-63-U-611   |           | 68       | 66                    | -3.0   |
| CB+FA-125-U-611  |           | 67       | 66                    | -1.5   |
| CB+FA-250-U-611  |           | 66       | 66                    | 0.0    |
| CB+FA-63-Si-266  |           | 77       | 75                    | -2.7   |
| CB+FA-125-Si-266 |           | 76       | 76                    | 0.0    |
| FA-250-Si-266    |           | 74       | 75                    | +1.3   |
| CB+FA-63-VTMOEO  |           | 67       | 66                    | -1.5   |
| CB+FA-125-VTMOEO |           | 65       | 66                    | +1.5   |
| CB+FA-250-VTMOEO |           | 65       | 65                    | 0.0    |
| CB+FA-63-MTMO    |           | 71       | 71                    | 0.0    |
| CB+FA-125-MTMO   |           | 70       | 70                    | 0.0    |
| CB+FA-250-MTMO   |           | 69       | 69                    | 0.0    |

Studies were carried out according to PN-ISO 188:2000. in the KC-65 type thermal chamber. Rubber samples were aged at 70 °C, for 72 hrs.
